# Supplementary material
Source: PubMed Central journal article supplement (PMC7564090)
Supplement: ja0c06419_si_001.pdf [file ja0c06419_si_001.pdf]

# Supporting Information for Influenza A M2 Inhibitor Binding Understood through Mechanisms of Excess Proton Stabilization and Channel Dynamics

Laura C. Watkins,<sup>1</sup> William F. DeGrado,<sup>2</sup> Gregory A. Voth<sup>1,\*</sup>

<sup>1</sup>Department of Chemistry, Chicago Center for Theoretical Chemistry, Institute for Biophysical Dynamics and James Franck Institute, The University of Chicago, Chicago, Illinois 60637, United States

<sup>2</sup>Department of Pharmaceutical Chemistry, University of California, San Francisco, San Francisco, California, 94158, United States

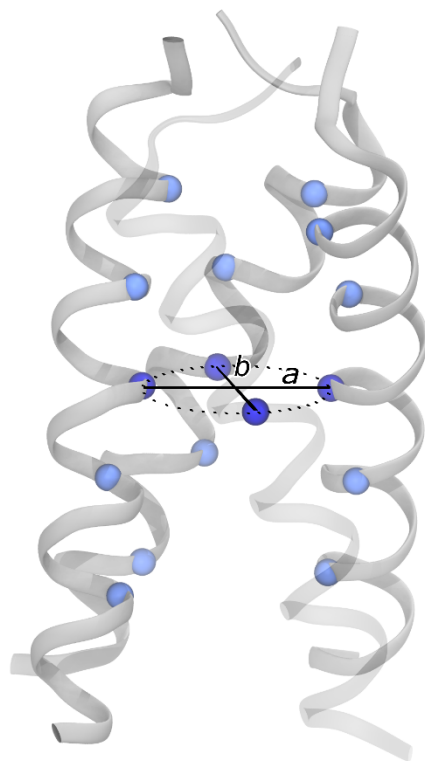

**SI Figure 1.** A schematic of eccentricity calculations, with pore-lining alpha-carbons shown as blue spheres. Dark blue spheres are Gly34 alpha-carbons. The major and minor axes of the oval are defined by the distances between alpha-carbons on opposing helices, indicated as lines *a* and *b*.

**SI Table 1.** Eccentricity values of the pore at each of the pore-lining residues, calculated using alpha-carbon positions as described in the text. Eccentricity was calculated for proton positions in the top <sup>1</sup>half of the channel,  $CEC_z = [-18.0, -1.0]$  Å.

| <b>Residue</b> | <b>Average <math>e</math> over all <math>CEC_z</math></b> | <b>Max value of <math>e</math> and position</b> | <b>Min value of <math>e</math> and position</b> | <b>Difference between max and min values</b> | <b>RMSD</b> |
|----------------|-----------------------------------------------------------|-------------------------------------------------|-------------------------------------------------|----------------------------------------------|-------------|
| <b>Val27</b>   | 0.34                                                      | 0.43<br>$CEC_z = -4.0$ Å                        | 0.27<br>$CEC_z = -17.5$ Å                       | 0.16                                         | 0.13        |
| <b>Ser31</b>   | 0.29                                                      | 0.41<br>$CEC_z = -10.0$ Å                       | 0.25<br>$CEC_z = -2.5$ Å                        | 0.16                                         | 0.13        |
| <b>Gly34</b>   | 0.38                                                      | 0.57<br>$CEC_z = -16.5$ Å                       | 0.28<br>$CEC_z = -6.0$ Å                        | 0.29                                         | 0.17        |
| <b>His37</b>   | 0.42                                                      | 0.65<br>$CEC_z = -16.5$ Å                       | 0.30<br>$CEC_z = -9.0$ Å                        | 0.35                                         | 0.18        |
| <b>Trp41</b>   | 0.40                                                      | 0.60<br>$CEC_z = -16.0$ Å                       | 0.27<br>$CEC_z = -4.0$ Å                        | 0.33                                         | 0.17        |
